# Supplementary material
Source: MDPI journal article supplement (https://www.mdpi.com/2079-6447/3/2/9)
Supplement: s1 [file s1]

## Supplementary information

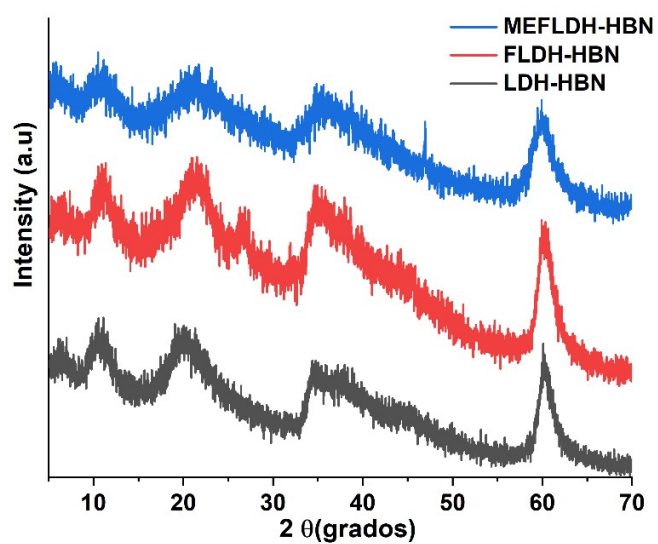

Figure S1. XRD patterns of pigments prepared from combination of layered double hydroxides and hydroxynaphthol blue.

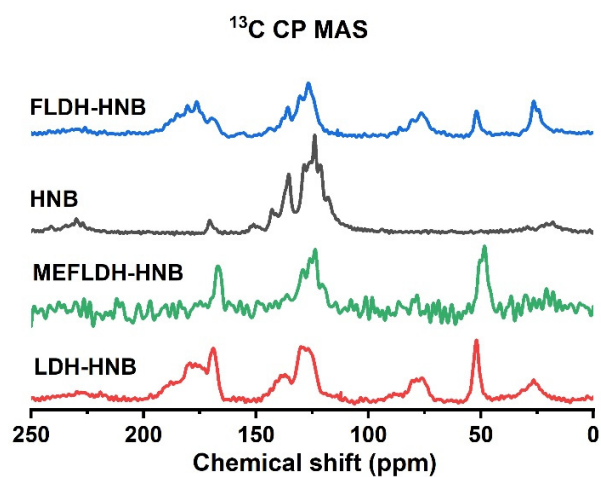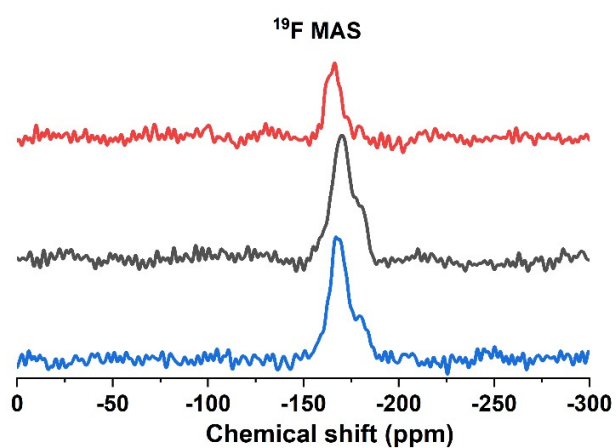

Figure S2.  $^{13}\text{C}$ CP/MAS NMR and  $^{19}\text{F}$  MAS NMR spectra of pigments prepared from combination of layered double hydroxides and hydroxynaphtol blue.

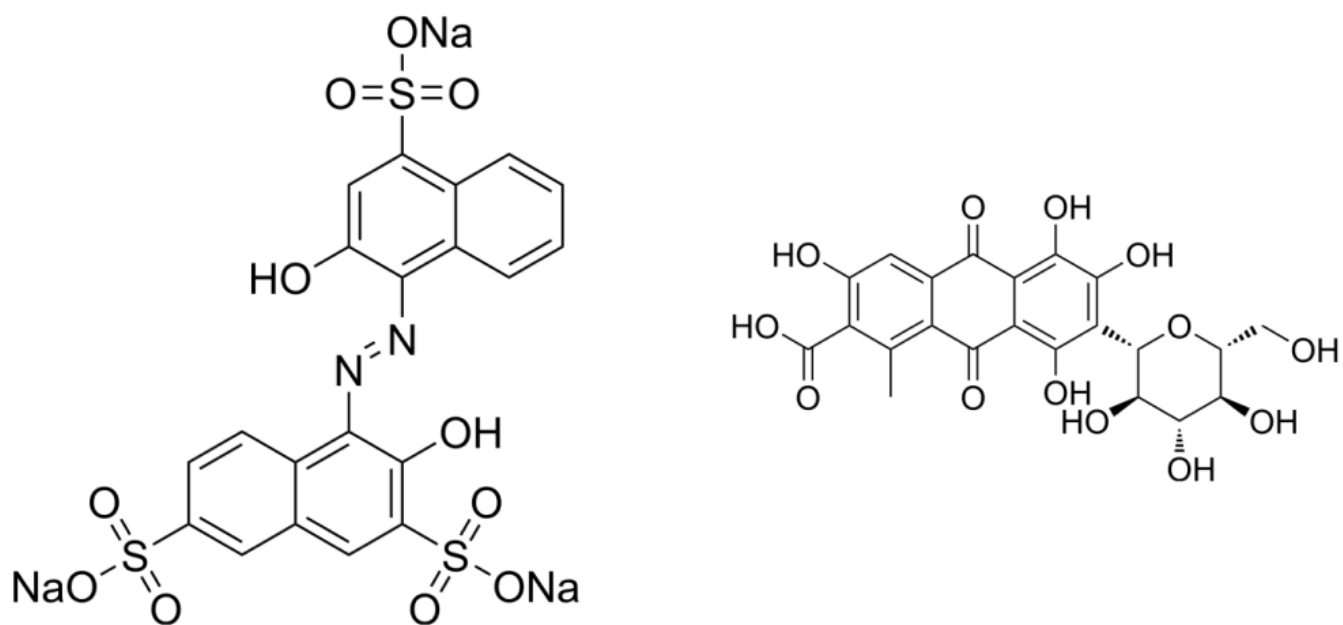

Figure S3. Chemical structure of hydroxynaphtol blue (left) and carminic acid (right).

| Sample       | Specific Surface area<br>(m <sup>2</sup> /g) | Pore volume<br>[cm <sup>3</sup> (STP)/g <sup>-1</sup> ] | Pore diameter<br>(nm) |
|--------------|----------------------------------------------|---------------------------------------------------------|-----------------------|
| LDH          | 310.39                                       | 71.313                                                  | 2.42                  |
| FLDH         | 338.14                                       | 77.689                                                  | 2.42                  |
| LDH-CA       | 1.5675                                       | 0.3601                                                  | 3.28                  |
| FLDH-CA      | 3.222                                        | 0.7403                                                  | 3.7                   |
| FLDH-CA+MgO  | 1.9708                                       | 0.4528                                                  | 4.2                   |
| LDH-HNB      | 1.238                                        | 0.2844                                                  | 3.28                  |
| FLDH-HNB     | 0.89701                                      | 0.2061                                                  | 3.28                  |
| FLDH-HNB+MgO | 42.418                                       | 9.7456                                                  | 3.28                  |

Table S1. Textural properties of white layered double hydroxides and their respective pigments
